# Supplementary material
Source: Elsevier journal article supplement (https://publikationen.ub.uni-frankfurt.de/opus4/files/44101/mmc1.docx)
Supplement: mmc1 [file mmc1.docx]

**History of Bleeding and Outcomes with Apixaban versus Warfarin in Patients with Atrial Fibrillation in the ARISTOTLE Trial**

Short title: History of bleeding and outcomes in atrial fibrillation

Raffaele De Caterina1, Ulrika Andersson2, John H. Alexander3, Sana M Al-Khatib3, M. Cecilia Bahit4, Shinya Goto5, Michael Hanna6, Claes Held2,7, Stefan Hohnloser8, Elaine M. Hylek9, Fernando Lanas10, Renato D. Lopes3, José Lopez-Sendon11, Giulia Renda1, John Horowitz12, Christopher B. Granger3, Lars Wallentin2,7 on behalf of the ARISTOTLE Investigators

1Institute of Cardiology and Center of Excellence on Aging, G. d’Annunzio University, Chieti, Italy; 2Uppsala Clinical Research Center, Uppsala University, Uppsala, Sweden; 3Duke Clinical Research Institute, Duke Medicine, Durham, NC, USA; 4INECO Neurociencias Oroño, Rosario, Santa Fe, Argentina; 5Tokai University School of Medicine, Isehara, Japan; 6Bristol-Myers Squibb, Princeton, NJ, USA; 7Department of Medical Sciences, Cardiology, Uppsala University, Uppsala, Sweden; 8J.W. Goethe-University, Frankfurt, Germany; 9Boston University Medical Center, Boston, MA, USA; 10Universidad de La Frontera, Temuco, Chile; 11 Hospital Universitario La Paz, IdiPaz Madrid, Spain; 12Queen Elizabeth Hospital, Adelaide, Australia

**ONLINE SUPPLEMENTAL MATERIAL**

Address for correspondence:

Raffaele De Caterina, MD, PhD

Institute of Cardiology. “G. d’Annunzio” University – Chieti

C/o Ospedale SS. Annunziata

Via dei Vestini

66013 Chieti, Italy.

Tel. +39-0871-41512; FAX: +39-0871-402817; E-mail: [rdecater@unich.it](mailto:rdecater@unich.it)

**Online Supplement Table/Data 1: Definitions of Efficacy and Safety endpoints used in the ARISTOTLE data capturing, and definitions of history of major/minor bleeding**

**Efficacy Endpoints:** The primary efficacy endpoint was the time to first occurrence of confirmed stroke (ischemic, hemorrhagic, or of unspecified type) or SE, during the Intended Treatment Period.

The secondary efficacy endpoints included were the time to first occurrence of confirmed: stroke (hemorrhagic, ischemic or of unspecified type); SE; all-cause death; composite of stroke (ischemic, hemorrhagic, or of unspecified type), SE, major bleeding; composite of stroke (ischemic, hemorrhagic, or of unspecified type), SE, all-cause death; composite of stroke (ischemic, hemorrhagic, or of unspecified type), SE, major bleeding, all-cause death; composite of stroke (ischemic, hemorrhagic, or of unspecified type), SE, MI, all-cause death; composite of stroke (ischemic, hemorrhagic, or of unspecified type), SE, and major bleeding in warfarin- naïve subjects, during the Intended Treatment Period.

**Safety Endpoints:** The primary safety endpoint is the time from first dose of study drug to first occurrence of confirmed ISTH major bleeding during the Treatment Period. The secondary safety endpoints were the time from first dose of study drug to first occurrence, during the Treatment Period, of: composite of confirmed ISTH major bleeding and CRNM, and all bleeding events reported by the investigator. Other safety endpoints include the following during the Treatment Period: adjudicated bleeding events using GUSTO and TIMI guidelines, fractures, other AEs, abnormal standard clinical laboratory tests, vital signs, and ECGs.

***Safety Endpoints***

**Primary Safety:** days from first dose of study drug to first occurrence of confirmed ISTH major bleeding during the Treatment Period.

**Secondary Safety:** days from first dose of study drug to first occurrence, during the Treatment Period, of:

- composite of confirmed ISTH major bleeding and clinically relevant non-major bleeding (CRNM).
- all bleeding events reported by the investigator.

Other safety endpoints included adjudicated bleeding events using Global Use of Strategies to Open Occluded Coronary Arteries (GUSTO) and Thrombolysis in Myocardial Infarction (TIMI) bleeding criteria, fractures, other, AEs, abnormal clinical laboratory tests, vital signs and ECGs.

**Safety Event Definitions**

Suspected clinically relevant bleeding events were adjudicated by the Adjudication Committee. These bleeding events were adjudicated to determine whether they fit the following criteria:

- major, clinically relevant non-major or minor bleeding, per ISTH guidelines
- severe, moderate or mild bleeding, per GUSTO guidelines
- major or minor bleeding, per TIMI guidelines.

Bleeding classifications are defined below and in the Adjudication Committee charter according to each one of the ISTH, GUSTO and TIMI bleeding criteria.

Acute clinically overt bleeding

Defined as new onset, visible bleeding or signs or symptoms suggestive of bleeding that was confirmed by imaging techniques, which can detect the presence of blood (e.g., ultrasound, CT, MRI).

ISTH Bleeding Criteria

The baseline hemoglobin was defined as the closest hemoglobin value prior to the bleeding event.

Major bleeding was defined as a bleeding event that was:

- Clinically overt bleeding that was accompanied by one or more of the following:
- A decrease in hemoglobin (Hgb) of 2 g/dL or more
- A transfusion of 2 or more units of packed red blood cells
- Bleeding that occurred in at least one of the following critical sites: intracranial, intraspinal, intraocular (within the corpus of the eye; a conjunctival bleed is not an intraocular bleed), pericardial, intra-articular, intramuscular with compartment syndrome, and retroperitoneal.
- Bleeding that was fatal.

Clinically relevant non-major bleeding was defined as a bleeding event that was clinically overt that did not satisfy the criteria for major bleeding and that led to either:

- Hospital admission for bleeding
- Physician guided medical or surgical treatment for bleeding
- A change in antithrombotic therapy (including prolonged interruption of study drug) for bleeding.

Minor bleeding: All clinically overt bleeding events not meeting the criteria for either major bleeding or CRNM bleeding were classified as minor bleeding.

GUSTO Bleeding Criteria

Severe bleeding

- Intracranial bleeding.
- Bleeding resulting in hemodynamic compromise requiring treatment.

Moderate bleeding

- Bleeding resulting in the need for transfusion.

Mild bleeding

- Bleeding that did not require transfusion or cause hemodynamic compromise.

TIMI Bleeding Criteria

Major bleeding:

- Intracranial bleeding.
- Clinically overt bleeding (including bleeding evident on imaging studies) associated with a ≥5 gm/dL fall in hemoglobin or a 15% fall in hematocrit (Hct) from baseline, accounting for the effect of transfusions (1 unit packed red blood cells = 1 gm/dL Hgb = 3% Hct).

Minor bleeding

- Clinically overt bleeding (including bleeding evident on imaging studies) associated with a 3 gm/dL fall in hemoglobin or a 9% fall in Hct from baseline, accounting for the effect of transfusion (1 unit packed red blood cell = 1 gm/dL Hgb = 3% Hct).

Minimal bleeding

- Clinically overt bleeding (including bleeding evident on imaging studies) not meeting criteria for TIMI minor bleeding.

**Definitions of history of major/minor bleeding and frequency of their occurrence in the trial**

All types of history of clinically relevant or spontaneous bleeding were divided into the categories history of major or minor bleeding according to the table below. Since patients could have more than one type of bleeding history, there are some patients that had both a major and a minor bleeding history.

| **History of Major bleeding** | **No (%) of patients*** | **History of Minor bleeding** | **No (%) of patients** |
| --- | --- | --- | --- |
| Intracranial | 109 (0.60) | Hemorrhoidal | 454 (2.50) |
| Retroperitoneal | 14 (0.08) | Vaginal | 128 (0.71) |
| Intra-articular | 16 (0.09) | Bruising/Ecchymosis | 531 (2.93) |
| Pericardial | 12 (0.07) | Hematoma | 233 (1.28) |
| Intraspinal | 0 | Epistaxis | 763 (4.21) |
| Intramuscular with compartment syndrom | 5 (0.03) | Hematuria | 541 (2.98) |
| Intraocular | 167 (0.92) | Hemoptysis | 93 (0.51) |
| Hemothorax | 7 (0.04) | Other | 279 (1.54) |
|  |  | GI-Upper | 463 (2.55) |
|  |  | GI-Lower | 353 (1.95) |

*Percentage of 18137 patients on treatment with non-missing recording of bleeding history. Patients could have more than one type of bleeding history, so that percentages may sum up to more than 100%.
